# Supplementary material
Source: HighWire-hosted journal article supplement (https://jnm.snmjournals.org/highwire/filestream/97832/field_highwire_adjunct_files/0/238477_Supplemental_Data.pdf)
Supplement: 238477_Supplemental_Data.pdf [file 238477_Supplemental_Data.pdf]

Supplemental Table 1: Influence of partial volume effect correction (PVEC) on standardized uptake value ratio changes over time separated for AD and MCI patients.

| Region                | AD            |               |      |           | MCI          |              |                      |           |
|-----------------------|---------------|---------------|------|-----------|--------------|--------------|----------------------|-----------|
|                       | Without PVEC  | With PVEC     | P    | Cohen's d | Without PVEC | With PVEC    | P                    | Cohen's d |
| Left frontal cortex   | -0.023 ± 0.20 | 0.024 ± 0.28  | 0.09 | 0.13      | 0.027 ± 0.14 | 0.070 ± 0.25 | 0.0001               | 0.17      |
| Right frontal cortex  | -0.019 ± 0.20 | 0.058 ± 0.24  | 0.03 | 0.33      | 0.025 ± 0.12 | 0.072 ± 0.23 | 1.1×10 <sup>-5</sup> | 0.20      |
| Left temporal cortex  | 0.027 ± 0.15  | 0.194 ± 0.41  | 0.05 | 0.42      | 0.014 ± 0.11 | 0.048 ± 0.23 | 0.004                | 0.15      |
| Right temporal cortex | 0.039 ± 0.17  | 0.213 ± 0.42  | 0.03 | 0.36      | 0.015 ± 0.11 | 0.049 ± 0.26 | 0.007                | 0.13      |
| Left parietal cortex  | -0.054 ± 0.26 | 0.058 ± 0.26  | 0.11 | 0.43      | 0.022 ± 0.14 | 0.071 ± 0.30 | 0.002                | 0.17      |
| Right parietal cortex | -0.035 ± 0.21 | 0.098 ± 0.30  | 0.12 | 0.51      | 0.025 ± 0.13 | 0.072 ± 0.32 | 0.006                | 0.15      |
| Left hippocampus      | -0.129 ± 0.28 | 0.058 ± 0.16  | 0.06 | 0.85      | 0.002 ± 0.28 | 0.009 ± 0.36 | 0.61                 | 0.02      |
| Right hippocampus     | -0.122 ± 0.43 | -0.070 ± 0.54 | 0.12 | 0.05      | 0.017 ± 0.30 | 0.053 ± 0.50 | 0.045                | 0.06      |
| Left Brodmann area 9  | 0.005 ± 0.21  | 0.028 ± 0.49  | 0.76 | 0.03      | 0.035 ± 0.16 | 0.090 ± 0.33 | 0.0002               | 0.15      |
| Right Brodmann area 9 | 0.029 ± 0.22  | 0.081 ± 0.44  | 0.40 | 0.07      | 0.031 ± 0.15 | 0.084 ± 0.29 | 2.2×10 <sup>-5</sup> | 0.16      |
| Anterior cingulate    | 0.036 ± 0.17  | 0.199 ± 0.47  | 0.08 | 0.33      | 0.016 ± 0.13 | 0.052 ± 0.26 | 0.007                | 0.15      |
| Occipital             | 0.010 ± 0.14  | 0.165 ± 0.28  | 0.04 | 0.67      | 0.009 ± 0.10 | 0.038 ± 0.26 | 0.09                 | 0.13      |
| Composite             | -0.003 ± 0.16 | 0.121 ± 0.25  | 0.04 | 0.57      | 0.018 ± 0.11 | 0.057 ± 0.22 | 0.001                | 0.19      |

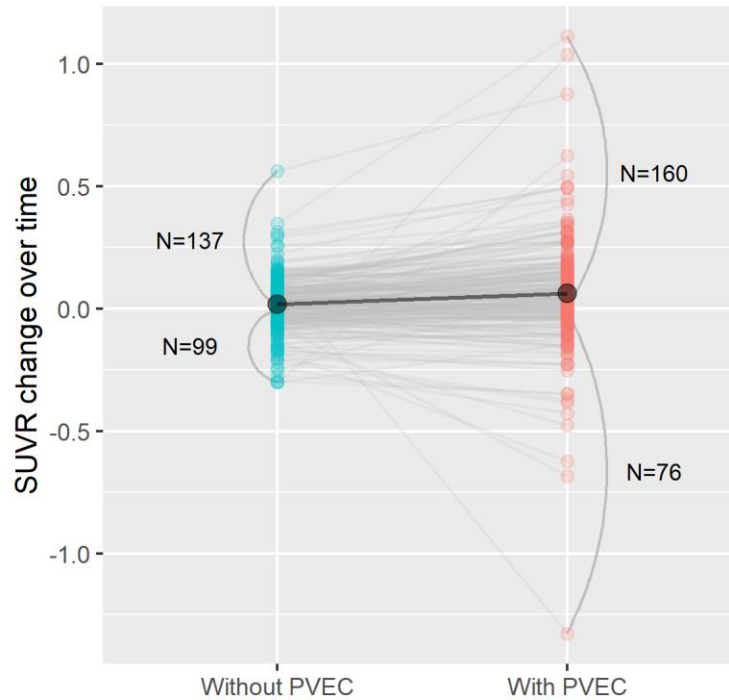

Supplemental Figure 1: Effect of PVEC on SUVR changes over time. On average, the SUVR changes over time in the composite region increased after PVEC ( $P = 1.9 \times 10^{-4}$ ). The amount of participants presenting SUVR increase and decrease over time is annotated for PVE-corrected and uncorrected data beside the curved lines.
